# Supplementary material
Source: publisher figshare collection journal article supplement (https://acs.figshare.com/ndownloader/files/13787579)
Supplement: Supplementary file 1 [file 13787579]

## Sheet: Sheet1
Compound Name	0uM	0.01uM	0.1uM	1uM	10uM	100uM	r.squared	adj.r.squared	sigma	statistic	p.value	df	logLik	AIC	BIC	deviance	df.residual
Acetolactate	0	0.0285405	0.159227	0.0744978	0.177877	0.0171902	0.100123	-0.124846	0.0804855	0.445051	0.541208	2	7.82083	-9.64167	-10.2664	0.0259117	4
Acetyl-aminoadipate	0	0.0480165	-0.0942464	0.0777062	-0.112222	-0.0147457	0.073288	-0.15839	0.0812831	0.316335	0.603844	2	7.76167	-9.52334	-10.1481	0.0264277	4
Acetyl-CoA	0	0.355332	0.312049	0.264122	0.17347	-0.258926	0.187773	-0.0152841	0.234681	0.92473	0.390692	2	1.39992	3.20016	2.57543	0.220301	4
Acetyl-diaminopimelate	0	-0.00424745	-0.0712491	0.115963	0.0432356	0.149015	0.491235	0.364044	0.0653636	3.86218	0.120826	2	9.0695	-12.139	-12.7637	0.0170896	4
Acetyl-glucosamine-phosphate	0	-0.14749	-0.621986	-0.237401	-0.261473	-0.4475	0.283314	0.104142	0.208622	1.58124	0.276992	2	2.10615	1.7877	1.16297	0.174093	4
Acetyl-glutamate 5-semialdehyde	0	-0.0773017	-0.145129	0.120145	-0.0353172	-0.105036	0.00583354	-0.242708	0.104504	0.0234711	0.885656	2	6.25397	-6.50793	-7.13265	0.043684	4
Acetylaminobutanal	0	-0.18927	0.037254	0.0258288	-0.0123916	0.395048	0.485387	0.356733	0.153494	3.77282	0.124038	2	3.94732	-1.89463	-2.51935	0.094242	4
Acetylhomoserine	0	-0.137758	-0.212514	0.0380256	-0.0259971	0.0873896	0.235667	0.0445838	0.110076	1.23332	0.32902	2	5.94229	-5.88457	-6.5093	0.0484666	4
Acetyllysine	0	-0.0897929	-0.167966	0.160372	0.105994	-0.212068	0.00268524	-0.246643	0.166586	0.0107699	0.922341	2	3.45621	-0.912423	-1.53714	0.111004	4
Acetylornithine	0	-0.0592379	-0.0200511	0.0658807	0.131914	0.132058	0.762503	0.703129	0.0440146	12.8423	0.0230929	2	11.4422	-16.8843	-17.5091	0.00774913	4
Adenine	0	0.193713	0.225457	0.216536	0.0549794	-0.346968	0.27891	0.0986371	0.207554	1.54716	0.28147	2	2.13696	1.72608	1.10136	0.172314	4
Adenosine	0	0.0859147	0.230459	-0.107001	-0.267714	-0.350149	0.59423	0.492788	0.155514	5.8578	0.0727403	2	3.86889	-1.73778	-2.3625	0.0967382	4
ADP	0	0.449206	0.465061	0.519154	0.339468	0.256594	0.0796423	-0.150447	0.20475	0.346136	0.587924	2	2.21856	1.56287	0.938152	0.16769	4
AICAR	0	-0.490511	-0.6806	-0.441447	-0.159277	-1.03542	0.32553	0.156913	0.339288	1.93059	0.237037	2	-0.811796	7.62359	6.99887	0.460465	4
Alanine	0	-0.073994	-0.0673586	0.0247118	0.0322742	-0.0916348	0.00214516	-0.247319	0.0609648	0.00859907	0.930576	2	9.48752	-12.975	-13.5998	0.0148668	4
Amino-oxopimelate	0	-0.0821019	-0.188568	0.120199	0.0604203	-0.0402206	0.0691453	-0.163568	0.11736	0.297126	0.614659	2	5.5578	-5.1156	-5.74032	0.0550939	4
Aminoacrylate	0	-0.0303616	-0.131233	0.0913073	0.547618	1.32142	0.683274	0.604093	0.348433	8.62923	0.0424925	2	-0.971388	7.94278	7.31805	0.485624	4
Aminoadipate-semialdehyde	0	-0.105916	-0.169119	-0.0777541	0.0990113	0.134422	0.380266	0.225332	0.10515	2.45438	0.192261	2	6.21696	-6.43392	-7.05864	0.0442262	4
Aminocyclopropane-carboxylate	0	-0.00450657	0.0104086	0.0993791	-0.0620157	-0.215755	0.348114	0.185142	0.0950552	2.13604	0.217678	2	6.82255	-7.6451	-8.26982	0.036142	4
AMP	0	-0.0601628	-0.367531	-0.165853	-0.268996	0.132237	0.00477458	-0.244032	0.203938	0.0191899	0.896517	2	2.24241	1.51519	0.890464	0.166362	4
Arginine	0	-0.037967	0.327616	0.109171	0.127221	0.571403	0.534272	0.41784	0.174873	4.58871	0.0988513	2	3.16493	-0.329866	-0.954588	0.122322	4
Aspartate	0	0.0039241	-0.0839449	0.127567	0.651323	1.40295	0.714992	0.64374	0.345935	10.0347	0.0339306	2	-0.928213	7.85643	7.2317	0.478685	4
Aspartate-semialdehyde	0	0.160617	0.123731	-0.0988759	0.0324173	0.451169	0.214664	0.0183305	0.188449	1.09336	0.354751	2	2.71632	0.567367	-0.0573551	0.142053	4
ATP	0	0.518643	0.36055	0.631075	0.25735	0.288988	0.051221	-0.185974	0.239609	0.215945	0.666315	2	1.27525	3.4495	2.82478	0.22965	4
Carbamoyl-aspartate	0	-0.144058	-0.290597	0.220709	0.0470723	-0.784374	0.185307	-0.0183666	0.355516	0.909823	0.394176	2	-1.09212	8.18424	7.55952	0.505565	4
cis-Aconitate	0	0.205097	0.011874	0.0575278	-0.0925092	0.0106064	0.187679	-0.0154012	0.0987348	0.924162	0.390824	2	6.59467	-7.18934	-7.81406	0.0389943	4
Citrate	0	0.225521	0.14343	0.244763	0.161033	0.445468	0.605525	0.506906	0.102992	6.14005	0.068364	2	6.34136	-6.68272	-7.30744	0.0424298	4
Citrulline	0	-0.142412	-0.0513241	0.0800352	0.110914	-0.098887	0.0453003	-0.193375	0.10889	0.189799	0.685563	2	6.00726	-6.01452	-6.63924	0.0474282	4
CMP	0	0.0561077	-0.348198	-0.296122	-0.71981	0.0570624	0.119738	-0.100327	0.32251	0.544104	0.501668	2	-0.507505	7.01501	6.39029	0.41605	4
CoA	0	0.564431	0.225393	0.379909	0.2768	0.271284	0.0348577	-0.206428	0.203785	0.144467	0.723201	2	2.24691	1.50619	0.881467	0.166113	4
Cysteine	0	0.231907	0.197533	0.307217	0.247143	0.0989784	0.096413	-0.129484	0.118971	0.426801	0.549212	2	5.47601	-4.95203	-5.57675	0.0566165	4
d-Ala-d-Ala	0	0.0661708	0.0601493	0.140588	0.198218	0.492286	0.787316	0.734146	0.091257	14.8073	0.0183335	2	7.06722	-8.13443	-8.75915	0.0333114	4
Deoxyadenosine	0	-0.0594173	-0.057863	0.116305	0.0383373	0.0257249	0.232036	0.0400448	0.0648039	1.20858	0.333334	2	9.1211	-12.2422	-12.8669	0.0167982	4
Dephospho CoA	0	-0.296687	-0.22601	-1.07855	-1.11393	0.607091	0.000475447	-0.249406	0.736557	0.00190269	0.967298	2	-5.46262	16.9252	16.3005	2.17006	4
dGMP	0	-0.0601628	-0.367531	-0.165853	-0.268996	0.132237	0.00477458	-0.244032	0.203938	0.0191899	0.896517	2	2.24241	1.51519	0.890464	0.166362	4
Diaminoheptanedioate	0	-0.229853	-0.307607	-0.0859932	0.100906	0.0180098	0.197589	-0.00301419	0.157035	0.984974	0.377151	2	3.81048	-1.62097	-2.24569	0.09864	4
Dihydroxy-isovalerate	0	-0.162428	-0.327423	-0.0313398	-0.114043	-0.507582	0.334856	0.16857	0.176596	2.01374	0.228884	2	3.10612	-0.212234	-0.836956	0.124744	4
Dimethylmalate	0	0.161396	0.0517163	0.0930613	0.00394887	0.121272	0.0208312	-0.223961	0.0718506	0.0850973	0.785008	2	8.50176	-11.0035	-11.6282	0.0206501	4
dTDP	0	0.0799874	0.0329269	-0.05164	-0.0232829	0.0195376	0.119522	-0.100598	0.0481237	0.542986	0.502082	2	10.9066	-15.8133	-16.438	0.00926356	4
dTMP	0	-0.186823	-0.275694	-0.81311	-0.241086	-0.584622	0.43013	0.287663	0.249238	3.01915	0.157284	2	1.03884	3.92233	3.2976	0.248479	4
dTTP	0	0.028035	0.230677	-0.739515	0.0952266	-0.113596	0.0439022	-0.195122	0.372761	0.183672	0.690307	2	-1.37633	8.75266	8.12793	0.555803	4
Fumarate	0	-0.227017	-0.0613312	-0.194123	-0.244215	-0.326455	0.634162	0.542702	0.0824593	6.93379	0.057991	2	7.67547	-9.35094	-9.97566	0.0271981	4
GABA	0	-0.259261	-0.200627	-0.173284	0.357792	1.39919	0.558979	0.448723	0.471079	5.06985	0.0874868	2	-2.78086	11.5617	10.937	0.887662	4
Galactinol	0	0.0102394	-0.144665	0.018238	-0.189095	-0.24475	0.590238	0.487798	0.0825999	5.76177	0.0743265	2	7.66524	-9.33048	-9.95521	0.027291	4
Galactitol	0	-0.00445492	0.134303	0.239844	0.143716	-0.124249	0.000837696	-0.248953	0.146936	0.00335359	0.956598	2	4.2093	-2.4186	-3.04332	0.0863612	4
Galactonate	0	-0.0076612	-0.0329443	0.311639	0.545767	0.963819	0.835054	0.793818	0.181247	20.2504	0.0108222	2	2.95013	0.099747	-0.524975	0.131402	4
Galactono-lactone	0	0.233884	0.108443	0.13463	0.14225	0.33946	0.448214	0.310267	0.0960522	3.24919	0.145805	2	6.75995	-7.51989	-8.14461	0.0369041	4
GDP-fucose	0	-0.249198	0.424379	0.687258	0.70312	0.837189	0.804669	0.755836	0.215112	16.4781	0.0153573	2	1.92235	2.15531	1.53059	0.185093	4
GDP-glucose	0	0.0349977	-0.210168	0.219577	-0.104907	-1.00518	0.388252	0.235315	0.376267	2.53864	0.186312	2	-1.43251	8.86501	8.24029	0.566309	4
Glucosamine phosphate	0	-0.643233	0.0424695	0.056029	-0.142498	-0.23567	0.00461281	-0.244234	0.296206	0.0185367	0.89828	2	0.00295667	5.99409	5.36937	0.350953	4
Glucose	0	0.216281	0.0279504	0.0187052	-0.0904159	0.31607	0.0521058	-0.184868	0.165938	0.21988	0.663547	2	3.47959	-0.959187	-1.58391	0.110142	4
Glutamate	0	-0.025394	0.00449202	0.0810178	-0.106576	-0.0162399	0.0483725	-0.189534	0.0657944	0.203325	0.675413	2	9.03009	-12.0602	-12.6849	0.0173156	4
Glutamine	0	-0.277102	-0.155159	-0.0158716	0.0175452	-0.609541	0.200069	8.65964e-05	0.241919	1.00043	0.373808	2	1.21769	3.56463	2.93991	0.234099	4
Glutamylcysteine	0	0.112719	0.071767	0.142275	0.057265	-0.0545562	0.0739209	-0.157599	0.0779757	0.319286	0.602223	2	8.01091	-10.0218	-10.6465	0.0243208	4
Glyceraldehyde3p/DHAP	0	-0.142813	-0.196665	-0.0364443	-0.0989074	-1.23703	0.446164	0.307706	0.392388	3.22236	0.147076	2	-1.6842	9.36841	8.74369	0.615872	4
Glycerate	0	0.151854	0.0943646	0.124446	0.0555388	-0.00418822	0.05359	-0.183012	0.0702707	0.226498	0.65896	2	8.63516	-11.2703	-11.895	0.0197519	4
Glycine	0	-0.155783	-0.172227	0.0100519	-0.0818802	-0.216983	0.149162	-0.0635472	0.0971884	0.701249	0.449481	2	6.68939	-7.37877	-8.00349	0.0377824	4
GMP	0	0.291724	0.191546	0.192777	-0.216303	0.52037	0.0525626	-0.184297	0.273766	0.221915	0.662127	2	0.475648	5.0487	4.42398	0.299792	4
Guanidinobutanal	0	0.0129105	0.0779494	0.14605	0.198007	0.0554512	0.389145	0.236431	0.0674355	2.5482	0.185655	2	8.88227	-11.7645	-12.3893	0.0181902	4
Guanine	0	0.57639	0.811032	0.105165	0.0344225	0.026476	0.115035	-0.106206	0.364561	0.519955	0.510755	2	-1.24287	8.48575	7.86103	0.53162	4
Hexose phosphate	0	-0.557156	-0.483269	-0.26508	-0.101554	-0.330174	0.000268902	-0.249664	0.240056	0.0010759	0.975405	2	1.26405	3.4719	2.84718	0.230508	4
Histidine	0	-0.237315	0.140865	-0.0653158	-0.00427189	0.366185	0.371154	0.213943	0.180771	2.36086	0.199222	2	2.96592	0.0681652	-0.556556	0.130712	4
Hydroxyectoine	0	-0.16594	-0.0697145	0.127905	0.159087	-0.123896	0.0493828	-0.188272	0.145056	0.207792	0.672154	2	4.28657	-2.57314	-3.19786	0.0841651	4
Imidazoleacetic acid	0	0.348698	0.194836	-0.0677891	-0.134323	0.0439598	0.199513	-0.000608464	0.178587	0.99696	0.374555	2	3.03886	-0.0777139	-0.702435	0.127573	4
Indolepyruvate	0	0.0196505	0.017871	0.0823354	-0.0213237	-0.313494	0.38335	0.229188	0.123238	2.48667	0.189947	2	5.26461	-4.52921	-5.15393	0.0607501	4
Isopropylmalate	0	-0.0684681	-0.152294	0.178482	-0.0649241	-0.796411	0.336835	0.171044	0.305282	2.03168	0.227183	2	-0.178127	6.35625	5.73153	0.372789	4
Isopropylmaleate	0	0.442363	0.344153	0.529949	0.426686	0.287434	0.205752	0.00718953	0.18504	1.03621	0.366267	2	2.82586	0.348271	-0.276451	0.136959	4
Ketoglutarate	0	0.0920838	-0.0202101	0.2154	-0.301163	-1.47028	0.506592	0.38324	0.489259	4.10689	0.112655	2	-3.00805	12.0161	11.3914	0.957496	4
Lactaldehyde	0	-0.0330148	-0.102738	0.0243486	0.408504	1.12177	0.646265	0.557831	0.312169	7.30789	0.0539092	2	-0.311973	6.62395	5.99922	0.389798	4
Lactate	0	0.18604	-0.024927	-0.240468	0.161207	0.553133	0.244699	0.0558736	0.259926	1.2959	0.318517	2	0.786905	4.42619	3.80147	0.270247	4
Leucine	0	0.0352154	0.151923	0.388159	0.250269	-0.325135	0.0262387	-0.217202	0.270963	0.107783	0.759149	2	0.537408	4.92518	4.30046	0.293683	4
Lysine	0	-0.250491	0.136282	0.0287377	0.0516095	0.589273	0.526409	0.408011	0.212289	4.4461	0.102655	2	2.00161	1.99678	1.37206	0.180266	4
Malate	0	-0.118818	-0.313295	-0.0773884	-0.161549	-0.484533	0.488969	0.361211	0.141432	3.82731	0.122064	2	4.4384	-2.8768	-3.50153	0.0800115	4
Mannosylglycerate	0	0.083931	0.0685494	0.0752446	-0.0103835	0.151108	0.18519	-0.0185129	0.0600813	0.909118	0.394342	2	9.57511	-13.1502	-13.7749	0.014439	4
meso-Diaminopimelate	0	-0.0997852	-0.13922	0.0815524	0.244296	-0.20173	0.00635824	-0.242052	0.18256	0.0255957	0.880646	2	2.90681	0.186381	-0.438341	0.133313	4
Methionineoxide	0	-0.20446	-0.246131	-0.182027	-0.0288559	0.84958	0.392481	0.240601	0.359775	2.58415	0.183217	2	-1.16357	8.32715	7.70243	0.517752	4
Methylcitrate	0	-0.146994	-0.216388	0.144646	0.104653	0.0503063	0.261509	0.0768857	0.137334	1.41645	0.299796	2	4.61478	-3.22957	-3.85429	0.075443	4
Methylhistidine	0	0.157236	0.490037	0.230168	0.0594484	0.265095	0.0564758	-0.179405	0.188635	0.239425	0.650241	2	2.71041	0.579172	-0.0455491	0.142333	4
Methylmalate	0	-0.0484561	-0.155849	0.0434903	-0.0596147	-0.0771779	0.0297114	-0.212861	0.0751422	0.122485	0.744006	2	8.233	-10.466	-11.0907	0.0225854	4
Methylmaleate	0	0.202737	0.0212705	0.0725165	-0.0788372	0.0353342	0.124635	-0.0942063	0.0976886	0.569522	0.492445	2	6.65859	-7.31717	-7.94189	0.0381723	4
Methylthioadenosine	0	-0.0674553	0.159203	0.358138	0.19069	-0.6054	0.107429	-0.115714	0.353757	0.481434	0.525961	2	-1.06236	8.12472	7.5	0.500575	4
NAD+	0	0.152242	0.000115375	0.279531	0.197446	0.0906714	0.173419	-0.0332267	0.1133	0.839209	0.411455	2	5.76907	-5.53815	-6.16287	0.0513473	4
Norepinephrine	0	0.0770013	0.0619908	-0.0146129	-0.011797	0.0214014	0.10481	-0.118987	0.0412167	0.468327	0.53135	2	11.8362	-17.6725	-18.2972	0.00679525	4
Ornithine	0	-0.212776	0.198047	-0.193715	-0.102663	0.792667	0.301148	0.126436	0.355223	1.72368	0.259476	2	-1.08718	8.17436	7.54963	0.504733	4
Oxo-proline	0	-0.00608889	0.00278473	0.0916342	-0.0744265	-0.227051	0.385985	0.232481	0.0943252	2.5145	0.187987	2	6.8688	-7.73761	-8.36233	0.035589	4
Oxoisovalerate	0	0.148285	0.120071	0.0290443	-0.218537	-0.630409	0.624287	0.530359	0.201373	6.64643	0.0614527	2	2.31835	1.3633	0.738576	0.162204	4
PABA	0	-0.159549	-0.125036	-0.00997343	0.0741086	-0.605354	0.233138	0.0414221	0.239613	1.21606	0.33202	2	1.27515	3.44969	2.82497	0.229657	4
Pantoate	0	0.0461929	-0.220052	-0.0293789	-0.134521	-0.286564	0.524755	0.405944	0.101477	4.41672	0.103466	2	6.43032	-6.86063	-7.48535	0.0411901	4
Pantothenate	0	-0.0226416	-0.247681	-0.0126626	-0.0585799	-0.12583	0.0802085	-0.149739	0.101581	0.348812	0.586541	2	6.42417	-6.84834	-7.47307	0.0412746	4
Phenylalanine	0	-0.141544	-0.266447	-0.00110192	-0.170482	-0.412668	0.401828	0.252285	0.13743	2.68704	0.176511	2	4.61062	-3.22123	-3.84595	0.0755478	4
Phophoenolpyruvate	0	0.251119	0.137638	0.127985	0.0388276	-0.18237	0.315571	0.144464	0.137154	1.84429	0.246001	2	4.62267	-3.24533	-3.87006	0.0752449	4
Phospho-gluconate	0	0.040124	-0.166502	0.331955	1.47221	2.12418	0.769828	0.712285	0.503745	13.3783	0.0216252	2	-3.18312	12.3662	11.7415	1.01503	4
Proline	0	-0.120587	-0.122832	0.0286912	-0.0460685	-0.502708	0.347248	0.18406	0.175217	2.1279	0.218397	2	3.15313	-0.306259	-0.930981	0.122805	4
Pyrroline-hydroxy-carboxylate	0	-0.115937	0.0486418	0.261202	0.36903	-0.0140206	0.21417	0.0177126	0.182856	1.09016	0.35538	2	2.89712	0.205768	-0.418953	0.133745	4
Pyruvate	0	-0.0322283	-0.091123	0.0834802	-0.0433263	-0.230371	0.265868	0.0823354	0.100353	1.44861	0.295108	2	6.49714	-6.99428	-7.61901	0.0402828	4
Ribose-phosphate	0	-0.390236	-0.376257	-0.361406	-0.0320676	-0.400787	0.0663354	-0.167081	0.205052	0.284194	0.622208	2	2.20972	1.58056	0.955835	0.168185	4
S-Adenosylhomocysteine	0	0.0677971	-0.467193	-0.627925	-0.667153	-0.369339	0.518597	0.398246	0.242537	4.30904	0.106525	2	1.20237	3.59526	2.97053	0.235297	4
S-Adenosylmethionine	0	-0.691135	-0.180527	-0.225412	-0.501161	0.0133651	0.0127085	-0.234114	0.311757	0.0514884	0.831618	2	-0.304051	6.6081	5.98338	0.38877	4
Saccharopine	0	0.150985	0.279409	0.321534	0.177074	-0.0470401	0.00174066	-0.247824	0.164307	0.00697476	0.937455	2	3.53888	-1.07777	-1.70249	0.107987	4
Sedoheptulose phosphate	0	-0.439655	-0.634914	-0.256293	-0.0826547	-0.365097	0.00733929	-0.240826	0.261229	0.0295742	0.87181	2	0.756901	4.4862	3.86148	0.272963	4
Serine	0	-0.125307	-0.050797	0.112205	0.192338	0.21843	0.729153	0.661441	0.0804248	10.7685	0.0304567	2	7.82536	-9.65072	-10.2754	0.0258726	4
Stachyose	0	-0.522587	-0.498215	-0.0151478	-0.153244	-0.353825	0.00165602	-0.24793	0.261223	0.00663508	0.938992	2	0.757047	4.48591	3.86118	0.27295	4
Succinate	0	-0.0283559	-0.163594	0.0183295	0.442722	1.19943	0.63193	0.539913	0.346279	6.8675	0.0587629	2	-0.934179	7.86836	7.24364	0.479637	4
Succinate semialdehyde	0	0.0714872	-0.0276856	0.207544	-0.2563	-1.03398	0.498407	0.373009	0.354798	3.97459	0.116963	2	-1.08	8.16	7.53528	0.503528	4
Succinyl-diaminopimelate	0	-0.260321	-0.324878	0.0431726	-0.0354672	-0.183454	0.00197605	-0.24753	0.168344	0.00791986	0.933365	2	3.39324	-0.78649	-1.41121	0.113359	4
Threonine	0	-0.0540409	-0.0836657	-0.0618443	-0.000507623	0.0964082	0.296823	0.121029	0.0611188	1.68847	0.263635	2	9.47238	-12.9448	-13.5695	0.014942	4
Thymine	0	0.6226	0.428803	0.523761	0.292522	0.152451	0.000920966	-0.248849	0.261834	0.00368726	0.954493	2	0.74304	4.51392	3.8892	0.274227	4
Trehalose-Na adduct	0	-0.0489467	-0.0433411	0.00567455	0.0161631	-0.206745	0.257984	0.0724798	0.080005	1.39072	0.303636	2	7.85676	-9.71352	-10.3382	0.0256032	4
Tryptophane	0	0.149095	0.0206095	0.121253	-0.100691	-0.15742	0.408493	0.260617	0.103254	2.76239	0.171839	2	6.32615	-6.65231	-7.27703	0.0426454	4
Tyramine	0	0.460615	0.428713	0.412183	0.433705	0.534399	0.523189	0.403986	0.146892	4.38907	0.104239	2	4.21112	-2.42223	-3.04695	0.0863089	4
Tyrosine	0	0.0214899	-0.0295871	0.0589891	-0.00371537	0.0713815	0.25771	0.0721381	0.0375136	1.38873	0.303936	2	12.4011	-18.8022	-19.4269	0.00562907	4
UDP-glucose/galactose	0	-0.0667197	-0.101156	0.198084	-0.444372	-0.554137	0.461466	0.326832	0.232697	3.42757	0.137771	2	1.45087	3.09826	2.47354	0.216592	4
UDP-N-acetylglucosamine	0	-0.479741	-0.199835	-0.0147088	-0.0938428	-0.461835	0.0575025	-0.178122	0.233805	0.244043	0.647199	2	1.42238	3.15523	2.53051	0.218658	4
UMP	0	0.127281	0.091544	-0.393346	-0.0127503	0.0685778	0.0248246	-0.218969	0.210538	0.101826	0.765619	2	2.05129	1.89742	1.2727	0.177306	4
Uridine	0	0.0997473	0.0543012	0.140953	-0.148978	-0.167104	0.385591	0.231989	0.112782	2.51032	0.188278	2	5.79654	-5.59309	-6.21781	0.0508793	4
Valine	0	-0.0810417	-0.0524045	-0.235605	0.077825	0.201799	0.21975	0.0246871	0.146662	1.12656	0.348345	2	4.22053	-2.44105	-3.06577	0.0860386	4
